# Supplementary material for: The First Korean Family With Boucher-Neuhäuser Syndrome Carrying a Novel Mutation in PNPLA6
Source: PubMed Central journal article supplement — J Clin Neurol. 2022 Feb 25;18(2):233–4. doi: 10.3988/jcn.2022.18.2.233 (PMC8926775; doi:10.3988/jcn.2022.18.2.233), 2022-02-25
Supplement: jcn-18-233-s002.pdf [file jcn-18-233-s002.pdf]

**Supplementary Table 1.** Clinical features of the patients

|                                                                                                                                                                                        | Proband                                                                                                                                                                                                                                                                                      | Proband's sister                                                              |
|----------------------------------------------------------------------------------------------------------------------------------------------------------------------------------------|----------------------------------------------------------------------------------------------------------------------------------------------------------------------------------------------------------------------------------------------------------------------------------------------|-------------------------------------------------------------------------------|
| Sex                                                                                                                                                                                    | Male                                                                                                                                                                                                                                                                                         | Female                                                                        |
| Onset age                                                                                                                                                                              | Early teens                                                                                                                                                                                                                                                                                  | Late teens                                                                    |
| Initial symptoms                                                                                                                                                                       | Visual disturbance and delayed puberty                                                                                                                                                                                                                                                       | Gait disturbance                                                              |
| Key clinical features                                                                                                                                                                  | Cerebellar ataxia, hypogonadotropic hypogonadism, and chorioretinal dystrophy                                                                                                                                                                                                                | Cerebellar ataxia, hypogonadotropic hypogonadism, and chorioretinal dystrophy |
| Other neurological symptoms                                                                                                                                                            | Dysarthria, swallowing difficulty, gaze-evoked nystagmus, and peripheral neuropathy                                                                                                                                                                                                          | Dysarthria and alopecia                                                       |
| Endocrinological assessments                                                                                                                                                           |                                                                                                                                                                                                                                                                                              |                                                                               |
| Luteinizing hormone (1.5–9.3 mIU/mL)                                                                                                                                                   | 0.51                                                                                                                                                                                                                                                                                         | 0.303                                                                         |
| Follicle-stimulating hormone (males: 1.5–12.4 mIU/mL, follicular phase: 3.5–12.5 mIU/mL, luteal phase: 1.7–7.7 mIU/mL, postmenopause: 25.8–134.8 mIU/mL, menopause: 25.8–134.8 mIU/mL) | 0.86                                                                                                                                                                                                                                                                                         | 0.394                                                                         |
| Estrogen total (pg/mL)                                                                                                                                                                 | 486.0                                                                                                                                                                                                                                                                                        | -                                                                             |
| Estradiol (pg/mL)                                                                                                                                                                      | -                                                                                                                                                                                                                                                                                            | 18.66                                                                         |
| Testosterone (2.8–8.0 ng/mL)                                                                                                                                                           | 0.23                                                                                                                                                                                                                                                                                         | -                                                                             |
| Prolactin (males: 4.1–18.4 ng/mL, females: 4.79–23.3 ng/mL)                                                                                                                            | 8.87                                                                                                                                                                                                                                                                                         | 7.73                                                                          |
| Thyroid-stimulating hormone (0.27–4.2 mIU/mL)                                                                                                                                          | 6.0                                                                                                                                                                                                                                                                                          | 4.45                                                                          |
| Free thyroxine (0.93–1.71 ng/dL)                                                                                                                                                       | 0.98                                                                                                                                                                                                                                                                                         | 1.08                                                                          |
| Growth hormone (ng/mL)                                                                                                                                                                 | -                                                                                                                                                                                                                                                                                            | 3.19                                                                          |
| Cortisol (2–28 mg/dL)                                                                                                                                                                  | -                                                                                                                                                                                                                                                                                            | 7.91                                                                          |
| ACTH (7–10 a.m.: 7.2–63.3 pg/mL)                                                                                                                                                       | -                                                                                                                                                                                                                                                                                            | 36.3                                                                          |
| Somatomedin-C (155.3–667.1 ng/mL)                                                                                                                                                      | -                                                                                                                                                                                                                                                                                            | 119.8                                                                         |
| NCS                                                                                                                                                                                    | Left peroneal motor and sensory neuropathy                                                                                                                                                                                                                                                   | Not done                                                                      |
| EMG (measured right-side muscles: triceps, extensor digitorum communis, vastus lateralis, and tibialis anterior)                                                                       | Insertion activity: normal<br>Spontaneous activity:<br>no fibrillations, no positive sharp waves, no fasciculation, no myotonic response, and no BHP<br>Motor-unit potentials:<br>no reduced amplitudes, normal duration, no polyphasic waves, no giant waves, and full interference pattern | Not done                                                                      |

Normal ranges are within parentheses.

ACTH, adrenocorticotropic hormone; BHP, bizarre high-frequency potential; EMG, electromyography; NCS, nerve conduction study.
